# Supplementary material for: Immune adverse events (irAEs) with adjuvant ipilimumab in melanoma, use of immunosuppressants and association with outcome: ECOG-ACRIN E1609 study analysis
Source: PubMed Central journal article supplement — J Immunother Cancer. 2021 May 7;9(5):e002535. doi: 10.1136/jitc-2021-002535 (PMC8108687; doi:10.1136/jitc-2021-002535), 2021-05-07
Supplement: jitc-2021-002535supp001.pdf [file jitc-2021-002535supp001.pdf]

## **Supplementary Appendix**

### **Immune adverse events (irAEs) with adjuvant ipilimumab in melanoma, use of immunosuppressants and association with outcome: ECOG-ACRIN E1609 study analysis**

**Tarhini et al,**

| <b>Table of Contents</b>                                                                                                               | <b>Page</b> |
|----------------------------------------------------------------------------------------------------------------------------------------|-------------|
| <b>Figure S1.</b> Kaplan-Meier plots of relapse free survival (RFS) and overall survival (OS) with Grade 1-4 irAEs versus no irAE..... | 03          |
| <b>Table S5.</b> The outcomes of the multivariate models: irAE CTCAE Grade 1-2 or Grade 1-4 versus Grade 0.....                        | 05          |

**Figure S1.** Kaplan-Meier plots of relapse free survival (RFS) [Figure S1A: 5-year RFS 49% (95% CI: 45%-52%) versus 41% (95% 31%-50%)] and overall survival (OS) [Figure S1B] with Grade 1-4 irAEs versus no irAE, respectively.

**Figure S1A**

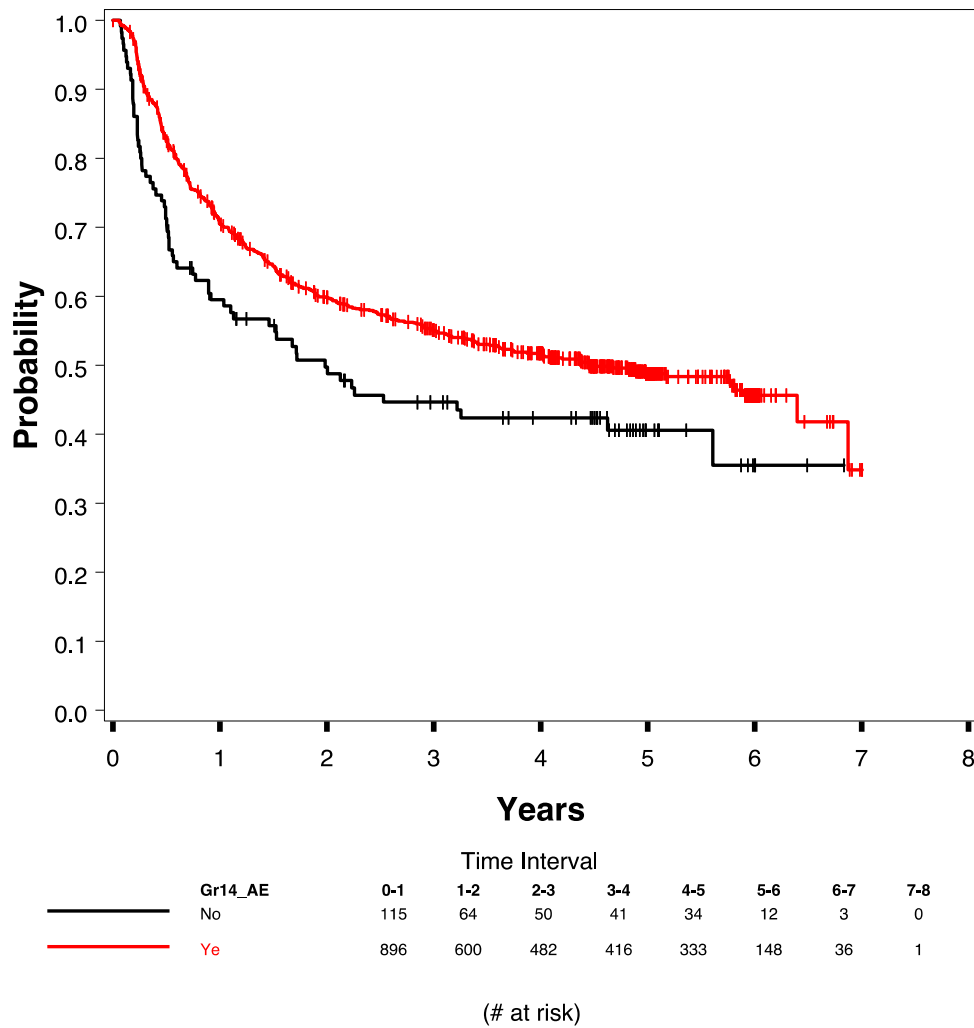

**Figure S1B**

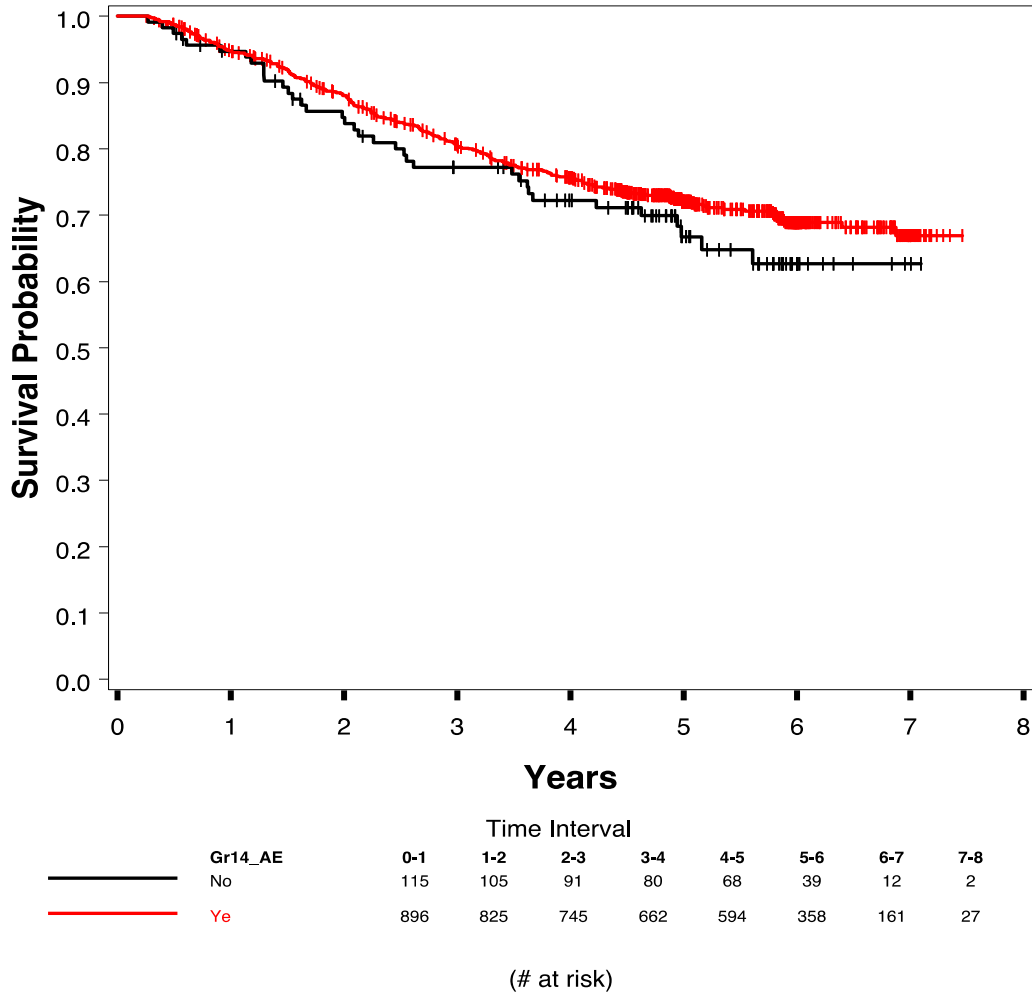

**Table S5.** Multivariate models: irAE CTCAE Grade 1-2 or Grade 1-4 versus Grade 0.

| Variable                                                                         | Hazard Ratio | 95% CI     | P-value |
|----------------------------------------------------------------------------------|--------------|------------|---------|
| <b>(a)</b> RFS outcomes in the multivariate model for <b>any</b> irAE Grade 1-2  |              |            |         |
| irAE                                                                             | 0.75         | 0.5, 1.03  | 0.072   |
| Age                                                                              | 1.31         | 1.01, 1.69 | 0.039   |
| Gender                                                                           | 0.73         | 0.55, 0.97 | 0.030   |
| Stage                                                                            | 1.33         | 1.10, 1.60 | 0.002   |
| Clark                                                                            | 1.50         | 1.21, 1.85 | < 0.001 |
| <b>(b)</b> RFS outcomes in the multivariate model for <b>any</b> irAE Grade 1-4  |              |            |         |
| irAE                                                                             | 0.73         | 0.55, 0.99 | 0.041   |
| Age                                                                              | 1.26         | 1.02, 1.54 | 0.030   |
| Stage                                                                            | 1.34         | 1.16, 1.54 | < 0.001 |
| Thickness                                                                        | 1.31         | 1.05, 1.65 | 0.019   |
| Clark                                                                            | 1.27         | 1.07, 1.50 | 0.006   |
| <b>(c)</b> RFS outcomes in the multivariate model for <b>rash</b> irAE Grade 1-2 |              |            |         |
| Rash                                                                             | 0.71         | 0.57, 0.87 | 0.001   |
| Age                                                                              | 1.31         | 1.01, 1.62 | 0.013   |
| Thickness                                                                        | 1.29         | 1.02, 1.63 | 0.036   |
| Clark                                                                            | 1.31         | 1.10, 1.56 | 0.003   |
| PS                                                                               | 1.31         | 1.01, 1.70 | 0.041   |
| Stage                                                                            | 1.36         | 1.17, 1.57 | <0.001  |
| <b>(d)</b> OS outcomes in the multivariate model for <b>rash</b> irAE Grade 1-2  |              |            |         |
| Rash                                                                             | 0.72         | 0.55, 0.96 | 0.024   |
| Age                                                                              | 1.38         | 1.04, 1.82 | 0.025   |
| Clark level                                                                      | 1.40         | 1.13, 1.74 | 0.002   |
| <b>(e)</b> RFS outcomes in the multivariate model for <b>rash</b> irAE Grade 1-4 |              |            |         |
| Rash                                                                             | 0.71         | 0.58, 0.88 | 0.001   |

|                                                                                         |      |            |        |
|-----------------------------------------------------------------------------------------|------|------------|--------|
| Age                                                                                     | 1.25 | 1.02, 1.54 | 0.032  |
| Thickness                                                                               | 1.29 | 1.02, 1.63 | 0.018  |
| Clark                                                                                   | 1.28 | 1.08, 1.51 | 0.005  |
| PS                                                                                      | 1.26 | 0.97, 1.62 | 0.080  |
| Stage                                                                                   | 1.34 | 1.16, 1.54 | <0.001 |
| <b>(f) OS outcomes in the multivariate model for rash irAE Grade 1-4</b>                |      |            |        |
| Rash                                                                                    | 0.76 | 0.58, 1.00 | 0.047  |
| Age                                                                                     | 1.29 | 0.98, 1.69 | 0.067  |
| Clark                                                                                   | 1.33 | 1.06, 1.67 | 0.015  |
| Thickness                                                                               | 1.29 | 0.95, 1.75 | 0.094  |
| <b>(g) RFS outcomes in the multivariate model for rash and endocrine irAE Grade 1-2</b> |      |            |        |
| Endocrine                                                                               | 0.68 | 0.54, 0.84 | <0.001 |
| Age                                                                                     | 1.29 | 1.04, 1.61 | 0.024  |
| Gender                                                                                  | 0.77 | 0.60, 0.98 | 0.031  |
| Stage                                                                                   | 1.34 | 1.16, 1.58 | <0.001 |
| Clark                                                                                   | 1.40 | 1.18, 1.67 | <0.001 |
| PS                                                                                      | 1.30 | 0.99, 1.71 | 0.057  |
| <b>(h) OS outcomes in the multivariate model for rash and endocrine irAE Grade 1-2</b>  |      |            |        |
| Rash and endocrine                                                                      | 0.68 | 0.51, 0.92 | 0.008  |
| Age                                                                                     | 1.33 | 0.99, 1.79 | 0.014  |
| Gender                                                                                  | 0.75 | 0.54, 1.04 | 0.080  |
| Clark                                                                                   | 1.38 | 1.10, 1.74 | 0.006  |
| <b>(i) RFS outcomes in the multivariate model for rash and endocrine irAE Grade 1-4</b> |      |            |        |
| Rash and endocrine                                                                      | 0.71 | 0.55, 0.91 | 0.008  |
| Age                                                                                     | 1.28 | 1.03, 1.55 | 0.028  |
| Thickness                                                                               | 1.31 | 1.04, 1.64 | 0.021  |
| Stage                                                                                   | 1.33 | 1.16, 1.54 | <0.001 |
| Clark                                                                                   | 1.26 | 1.07, 1.49 | 0.007  |
| PS                                                                                      | 1.24 | 0.96, 1.59 | 0.010  |
| <b>(j) OS outcomes in the multivariate model for rash and endocrine irAE Grade 1-4</b>  |      |            |        |
| Rash and endocrine                                                                      | 0.76 | 0.58, 1.00 | 0.054  |

|           |      |            |       |
|-----------|------|------------|-------|
| Age       | 1.30 | 0.99, 1.71 | 0.056 |
| Clark     | 1.32 | 1.06, 1.67 | 0.016 |
| Thickness | 1.29 | 0.95, 1.75 | 0.097 |
